# Supplementary material for: ChIP-seq Analysis of the Global Regulator Vfr Reveals Novel Insights Into the Biocontrol Agent Pseudomonas protegens FD6
Source: Front Microbiol. 2021 May 14;12:667637. doi: 10.3389/fmicb.2021.667637 (PMC8160232; doi:10.3389/fmicb.2021.667637)
Supplement: Supplementary file 4 [file Table_1.XLSX]

## Sheet: Sheet1
Supplementary Table S1 Primer and oligonucleotide sequences.
Primers used for bacterial one-hybrid
Primer name	Sequence（5’ →3’）	amplicon
pTRG-vfr-F	CGGAATTCATGGTTGCTATTGCCCCCACC	645 bp
pTRG-vfr-R	CCCTCGAGTTAGCGGGTGCCGAACACCAC
vfrp-F	CGGAATTCGTCGCCAGCTTAGCACA	350 bp
vfrp-R	GCTCTAGAGAGCCCTTGATGATGAAATA
phlFp-F	CGGAATTCCACCAACCCCTACGACTCAC	342 bp
phlFp-R	GCTCTAGACCATCCCGGAACGAATGT
phlGp-F	CGGAATTCAGCCAGGGCATAGCTCATC	456 bp
phlGp-R	GCTCTAGACACTTCGAGAACAAGGACGG
Primers used for ChIP
Primer name	Sequence（5’ →3’）	Purpose
pBBR-v-Flag-F	GGGGTACCTATGGTTGCTATTGCCC	To amplify a 724 bp fragment containing the vfr-3xFlag region
pBBR-v-Flag-R	CCAAGCTTTCACTTATCGTCATCGTCC
pBBR-R-F	AAGCTTGATATCGAATTCCTGCAGC	To construct pBBR-3Flag vector
pBBR-R-R	AGGTACCCAGCTTTTGTTCC
Flag-infusion-F	GGAACAAAAGCTGGGTACCTGACTACAAAGACCATGATGG	To construct pBBR-3Flag vector
Flag-infusion-R	AGGAATTCGATATCAAGCTTTCACTTATCGTCATCGTCCT
pBBR-F	AGCGCGCAATTAACCCTCAC	To verify the pBBR-vfr-3Flag vector
pBBR-R	CCAGTGAGCGCGCGTAATAC
3Flag-F	GCGATTCAGGTTCATCATGC	To verify the pBBR-3Flag vector
3Flag-R	CGATGTCGTGATCCTTATAGTC
Primers used for EMSA
Primer name	Sequence（5’ →3’）	amplicon
EMSA-vfr-F	CCTTCATCGCCAAGACTCCACTG	186 bp
EMSA-vfr-R	GAGGACGTTGAACGCTGGCTAAG
EMSA-phlF-F	AAAACTGCCGTCAAACTCGG	241 bp
EMSA-phlF-R	CAGCGGTTACGACGCCTATT
EMSA-phlG-F	CAGGCCGGGCAGTACGTT	240 bp
EMSA-phlG-R	GAGGGCTGGGCACTGAAA
EMSA-vfr’-F	GGGCTGCGCTTTGCATGTTCACAGC	25 bp
EMSA-vfr’-R	CGACACTTGTACGTTTCGCGTCGGG
EMSA-phlF’-F	CAGCGGTTACGACGCCTATTGCGCC	25 bp
EMSA-phlF’-R	CCGCGTTATCCGCAGCATTGGCGAC
EMSA-phlG’-F	GGAACAGGCAGGGCGCGAACACACT	25 bp
EMSA-phlG’-R	TCACACAAGCGCGGGACGGACAAGG
vfr-mut-F	GGGCTGCGCTTTGCATGTTTTTTGC	25 bp
vfr-mut-R	CGTTTTTTGTACGTTTCGCGTCGGG
phlF-mut-F	CAGCGGTATTTACGCCTATTGCGCC	25 bp
phlF-mut-R	CCGCGTTATCCGCATTTATGGCGAC
phlG-mut-F	GGAACAGGCAGGGCGCGAATTTTCT	25 bp
phlG-mut-R	TCTTTTAAGCGCGGGACGGACAAGG
Vfr-pET22F	CGCCATATGGTTGCTATTGCCCCCAC	645 bp
Vfr-pET22R	TATCTCGAGGCGGGTGCCGAACAC
Primer sequences for qRT-qPCR
Primer name	Sequence （5’ →3’）
vfr-qpcr-F	GTCGCCGAGATCAGCTACATCAAG
vfr-qpcr-R	CACGTCGAAGAACGCCAGGTC
kdO-qpcr-F	GTTGCCGATCACCGTGACCTG
kdO-qpcr-R	ATGCTGGATTCGTGGCTCATTGG
algZ-qpcr-F	GGTGCCTTGGGTGAAGAGTTGAG
algZ-qpcr-R	AGTTGGCGGAAGCGTTGAAGC
OsmC-qpcr-F	ACGCTCGGCTTCAAGAAAGGC
OsmC-qpcr-R	AGATGCTCCTGCTCGGTGTGG
mfsT-qpcr-F	CCTGACGGTGCTGATGGTGTTC
mfsT-qpcr-R	CAAGCGTGGCGGCGAATACTC
cobS-qpcr-F	GCAACGAACTTGAGCAACAGCAC
cobS-qpcr-R	GCACCTGGATGGATTGGCAGAC
spA-qpcr-F	ATGGCGTGGGTGACATTGATATGG
spA-qpcr-R	CGGTGGGCTTCGGCAACATC
argH-qpcr-F	ACAAGGACAATCAGGAAGACAAGGAAC
argH-qpcr-R	ATGGCGTGCTTGGGCTTGATG
rbsC-qpcr-F	GACAGTCAGCGTGGCGATTCTC
rbsC-qpcr-R	GGGACACAATGAACGACGGGATAC
tssJ-qpcr-F	TATTGGGCAGGGCTGGATGGG
tssJ-qpcr-R	TGGCGAGTCGGGGTCAACAC
tssA-qpcr-F	GCAGCACTTCTCGGGCGAAAG
phlG-qpcr-F	ACCGCACAGATGTTCAAGTGGTG
phlG-qpcr-R	GCTCAAGGATTCGTCGCTCAGG
phlF-qpcr-F	CAACCGTGAATTGCTGCTGGATATG
phlF-qpcr-R	AATGTCCTGTTCCGCCGTCAAC
skP-qpcr-F	TCCAAGGAACTGAACGAAGCCAAG
skP-qpcr-R	GCCACGCTCGAAAACCAGGTC
phnN-qpcr-F	CCAGCAGATGTTCCAGGGTTGTC
phnN-qpcr-R	CCGGAGATAGAGCGTCGCCTAC
betA-qpcr-F	GGCGAATGCTGTCCACTTCCAG
betA-qpcr-R	GTGCCTGAGCTTCGACAACCTG
CheWB-qpcr-F	GCTCAGGCTCTACTGGCTAAATCG
CheWB-qpcr-R	AGGCAGTTGATCGCTTCTTCGTC
gmC-qpcr-F	GCTGCTGCGGATGACCTTCG
gmC-qpcr-R	GCCTTGGGATTCATCGCCTCAG
cobC-qpcr-F	CCGCTGCAAGGGTGAACTGAC
cobC-qpcr-R	TGGACGACGCCCTGACAGAG
rluD-qpcr-F	GATCACCGCTCCGTCAACAGTC
rluD-qpcr-R	TCAAGTCGCCGCACAACTATTCG
ardC-qpcr-F	TCGCCCGAGGTCATCAATCCC
ardC-qpcr-R	CAGCCAGGTGTAGCCGTTGTTC
rieskE-qpcr-F	CGACGGTTTCCACACCCACTTC
rieskE-qpcr-R	GGTGCCTTCTTCGCTGTACTGC
cbD-qpcr-F	GCAACCGCCACCACTCCATC
cbD-qpcr-R	CAACTCCTGGGTCATCACCAACTG
hcnB-qpcr-F	TTGAGCAAGATCGCCAAGCAGAG
hcnB-qpcr-R	ACCACGCCCCAGCCATAGC
hpB-qpcr-F	GGTTGTCACGGGTCAGGTTGC
hpB-qpcr-R	TTAGGTGCCTTGCTGCTGCTTG
hemB-qpcr-F	CCGACACCTGCTTCTGCGAATAC
hemB-qpcr-R	GCCTGCTTGCCGAGGTTGATC
fdsA-qpcr-F	CACCCAGTCGCCTTCGTTGATG
fdsA-qpcr-R	CCGCATCCTCAGCCAGTACAAC
fdsA-qpcr-F	CACCCAGTCGCCTTCGTTGATG
fdsA-qpcr-R	CCGCATCCTCAGCCAGTACAAC
