# Supplementary material for: ChIP-seq Analysis of the Global Regulator Vfr Reveals Novel Insights Into the Biocontrol Agent Pseudomonas protegens FD6
Source: Front Microbiol. 2021 May 14;12:667637. doi: 10.3389/fmicb.2021.667637 (PMC8160232; doi:10.3389/fmicb.2021.667637)
Supplement: Supplementary file 5 [file Table_2.XLSX]

## Sheet: Sheet1
Supplementary Table S2 Vfr ChIP-seq peak locus of selected genes and oligonucleotide sequences.
Peak locus	Gene locus	The distance from peak to the gene TSS	PCR-F（5’ →3’）	PCR-R （5’ →3’）	PCR product loucs		PCR production length
NZ_CP031396.1:3192761-3193098	phlG:NZ_CP031396.1:3192543-3193632	386	AGCACCGACGAAGGCGACAG	GCTGCGGGCGATCATCACTG	NZ_CP031396.1:3192848-3192981		133
NZ_CP031396.1:3189789-3190119	phlF:NZ_CP031396.1:3189724-3190399	445	AACTCGGCGATGACGTTCTGATTG	CCGACACCATCAACCGCAACAC	NZ_CP031396.1:3189861-3190005		134
NZ_CP031396.1:2833578-2833968	Vfr:NZ_CP031396.1:2833443-2834088	329	CCTTCATCGCCAAGACTCCACTG	GAGGACGTTGAACGCTGGCTAAG	NZ_CP031396.1:2833363-2833525		162
